# Supplementary material
Source: PubMed Central journal article supplement (PMC5047113)
Supplement: supp_pp.16.01129_PP2016-01129DR1_Supplemental_Figures_1_4.pdf [file supp_pp.16.01129_PP2016-01129DR1_Supplemental_Figures_1_4.pdf]

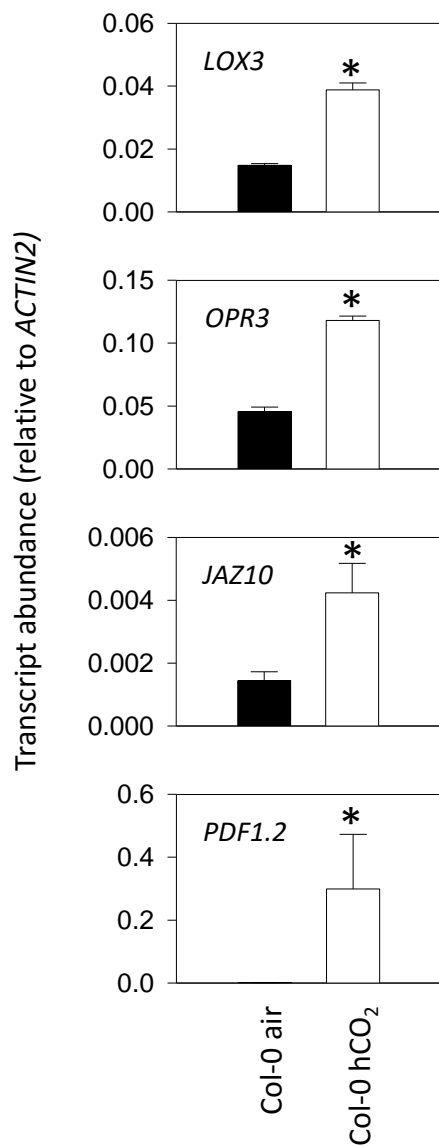

**Supplemental Fig. S1.** Quantitative PCR analysis of jasmonic acid-associated genes in plants grown in air (black bars) and high CO<sub>2</sub> (white bars). Data are means ± SE of three independent biological replicates. Significant difference between the two conditions ( $P < 0.05$ ) is indicated by \*.

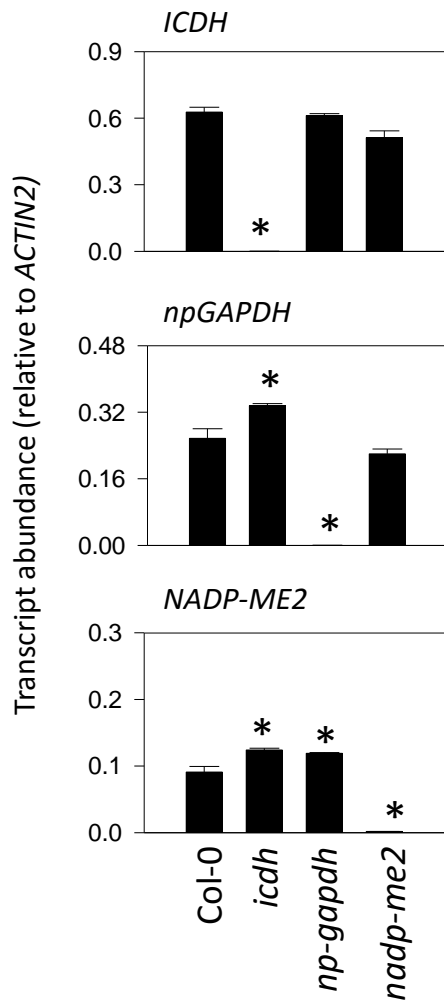

**Supplemental Fig. S2.** Quantitative PCR analysis of major NADP-dehydrogenase transcripts in Col-0 and the corresponding mutants grown at high CO<sub>2</sub>. Data are mean ± SE of three biological replicates. Significant difference from Col-0 ( $P < 0.05$ ) is indicated by \*. Only very low residual signals were observed for the corresponding transcripts in *icdh*, *np-gapdh* and *nadp-me2* mutants.

AIR

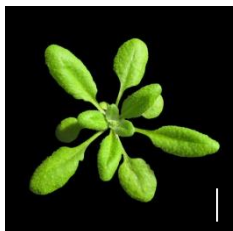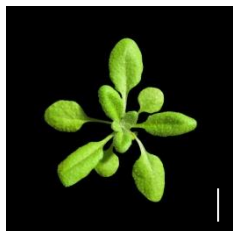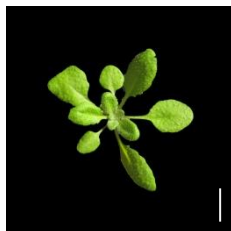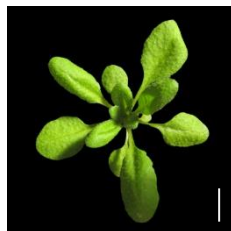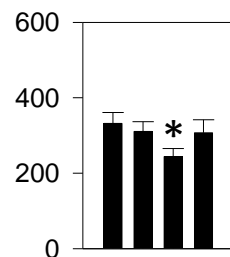

Rosette fresh weight (mg)

High CO<sub>2</sub>

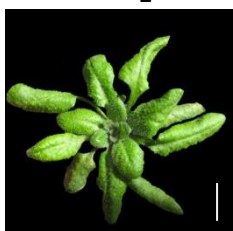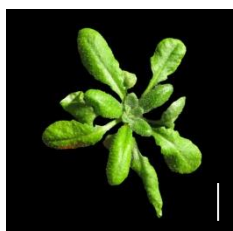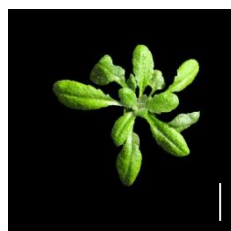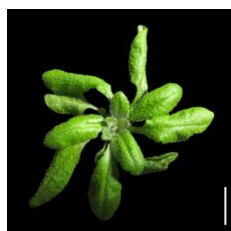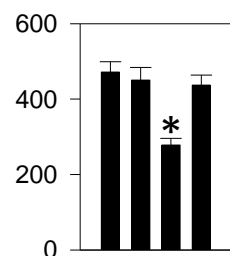

Col-0

*icdh*

*np-gapdh*

*nadp-me2*

Col-0  
*icdh*  
*np-gapdh*  
*nadp-me2*

**Supplemental Fig. S3.** Phenotypes of Col-0 and NADP-dehydrogenase mutants grown in air or at high CO<sub>2</sub>. The white bar indicates =1 cm. Rosette fresh weight was quantified in 12 plants. \*indicates significant difference from Col-0 at  $P < 0.05$ .

■ Oxidized form  
 □ Reduced form

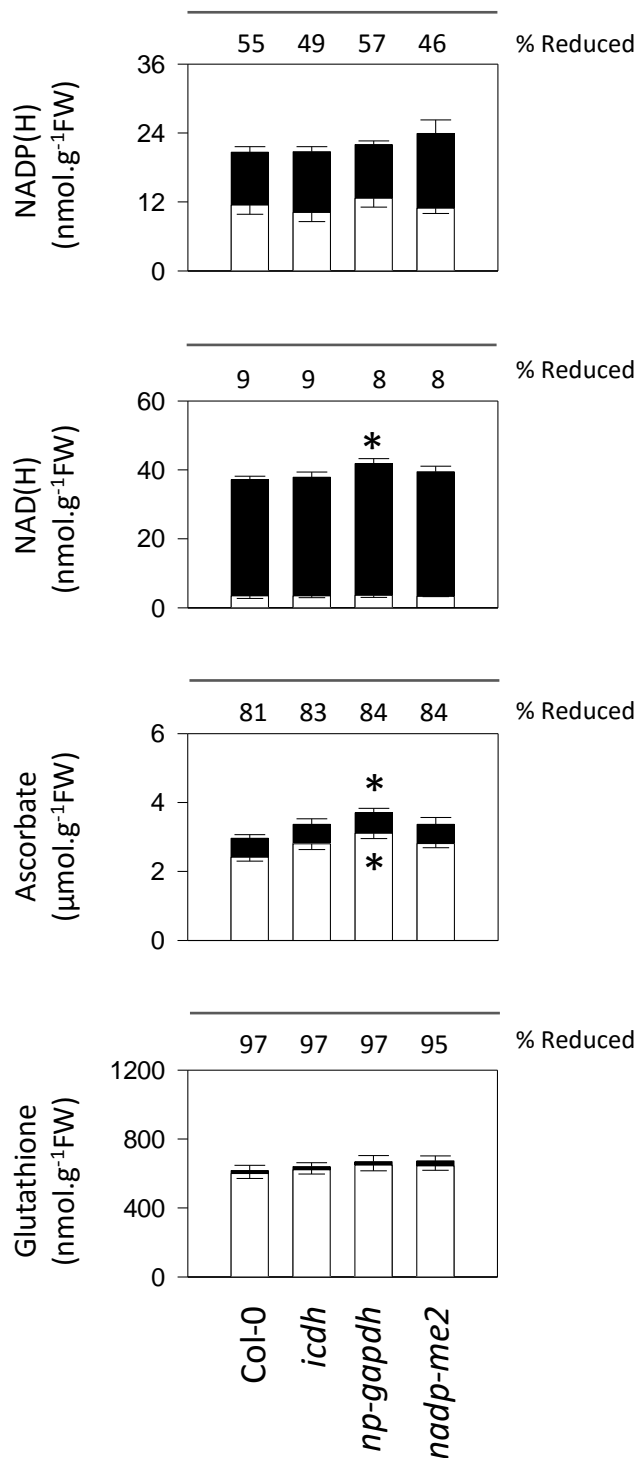

**Supplemental Fig. S4.** Effects of mutations in cytosolic NADP-linked dehydrogenases on intracellular redox markers in plants grown at high  $\text{CO}_2$ . Data are means  $\pm$  SE of four biological replicates. Redox states are indicated above the bars as the percentage of each compound found in the reduced form. Significant differences in pools from Col-0 values at  $P < 0.05$  are indicated by \*. No significant differences in reduction states were found.
