# Supplementary material
Source: PubMed Central journal article supplement (PMC5047113)
Supplement: supp_pp.16.01129_PP2016-01129DR1_Supplemental_Table_S2.pdf [file supp_pp.16.01129_PP2016-01129DR1_Supplemental_Table_S2.pdf]

1 **Supplemental Table S2.** Oligonucleotide sequences used in this study for analysis of transcripts abundance by  
 2 qRT-PCR

| 3  | -----                                      |                      |                                 |
|----|--------------------------------------------|----------------------|---------------------------------|
| 4  | Transcript description                     | Oligonucleotide name | Oligonucleotide sequence        |
| 5  | -----                                      |                      |                                 |
| 6  | <i>ACTIN2</i>                              | ForActin2            | 5'-CTGTACGGTAACATTGTGCTCAG-3'   |
| 7  |                                            | RevActin2            | 5'-CCGATCCAGACACTGTACTTCC-3'    |
| 8  |                                            |                      |                                 |
| 9  | <i>PATHOGENESIS-RELATED GENE 1 (PR1)</i>   | ForPR1               | 5'-AGGCTAACTACAACACTACGCTGCG-3' |
| 10 |                                            | RevPR1               | 5'-GCTTCTCGTTCACATAATTCCCAC-3'  |
| 11 |                                            |                      |                                 |
| 12 | <i>PATHOGENESIS-RELATED GENE 2 (PR2)</i>   | ForPR2               | 5'-TCAAGGAGCTTAGCCTCACC-3'      |
| 13 |                                            | RevPR2               | 5'-CGCCTAGCATCCCGTAGC-3'        |
| 14 |                                            |                      |                                 |
| 15 | <i>PATHOGENESIS-RELATED GENE 5 (PR5)</i>   | ForPR5               | 5'-GCCCTACCACCGTCTGG-3'         |
| 16 |                                            | RevPR5               | 5'-CGGGAAGCACCTGGAGTC-3'        |
| 17 |                                            |                      |                                 |
| 18 | <i>Isochorismate synthase 1 (ICS1)</i>     | ForICS1              | 5'-TTGGTGGCGAGGAGAGTG-3'        |
| 19 |                                            | RevICS1              | 5'-CTCCAGCTACTATCCCTGTCC-3'     |
| 20 |                                            |                      |                                 |
| 21 | <i>Ascorbate peroxidase 1 (APX1)</i>       | ForAPX1              | 5'-GCACTATTGGACGACCCTGT-3'      |
| 22 |                                            | RevAPX1              | 5'-GCAAACCCAAGCTCAGAAAG-3'      |
| 23 |                                            |                      |                                 |
| 24 | <i>Glutathione S-transferase (GSTU24)</i>  | ForgstU24            | 5'-GGCGAGTATGTTTGGGATG-3'       |
| 25 |                                            | RevgstU24            | 5'-TTCATCTCGAGGAGCAAGG-3'       |
| 26 |                                            |                      |                                 |
| 27 | <i>Heat shock protein (HSP17.6)</i>        | ForHSP17             | 5'-GGAGAAAGAAGATAAGAATGACACG-3' |
| 28 |                                            | RevHSP17             | 5'-TCAACACACCATTCTCCATCG-3'     |
| 29 |                                            |                      |                                 |
| 30 | <i>UDP-Glycosyltransferase (UGT73.B3)</i>  | ForUGT73.B3          | 5'-CCTCACCACCTCTCAACTC-3'       |
| 31 |                                            | RevUGT73.B3          | 5'-TCTGGTAACCCGAGATCCAC-3'      |
| 32 |                                            |                      |                                 |
| 33 | <i>Senescence associated gene (SAG12)</i>  | ForSAG12             | 5'-AAAGGCGAAGACGCTACTTG-3'      |
| 34 |                                            | RevSAG12             | 5'-TCATCAGTGCTTGTCTATCA-3'      |
| 35 |                                            |                      |                                 |
| 36 | <i>Respiratory burst oxidase homolog D</i> | ForRBOHD             | 5'-CTGGACACGTAACGTCAGGA-3'      |
| 37 |                                            | RevRBOHD             | 5'-GCCGAGACCTACGAGGAGTA-3'      |
| 38 |                                            |                      |                                 |
| 39 | <i>Respiratory burst oxidase homolog F</i> | ForRBOHF             | 5'-TCACAAATCAACGACGAGAGTT-3'    |
| 40 |                                            | RevRBOHF             | 5'-CCCATCTTCATTCTGTCCA-3'       |
| 41 |                                            |                      |                                 |
| 42 | <i>Plant defensin (PDF1.2)</i>             | ForPDF1.2            | 5'-CCAAACATGGATCATGCAAC-3'      |
| 43 |                                            | RevPDF1.2            | 5'-CACACGATTTAGCACCAAAGA-3'     |
| 44 |                                            |                      |                                 |
| 45 | <i>Lipoxygenase (LOX3)</i>                 | ForLOX3              | 5'-GTGGCCGGAGTTATCAACC-3'       |
| 46 |                                            | RevLOX3              | 5'-GGGACGTAGCCACCGTAAG-3'       |
| 47 |                                            |                      |                                 |
| 48 | <i>OPDA reductase (OPR3)</i>               | ForOPR3              | 5'-GGCTCAAAGCTCGCTTACC-3'       |
| 49 |                                            | RevOPR3              | 5'-ACTCCCTTGCCTTCCAGACT-3'      |

|    |                                                |          |                                  |
|----|------------------------------------------------|----------|----------------------------------|
| 50 |                                                |          |                                  |
| 51 | <i>Jasmonate-Zim-domain protein 10 (JAZ10)</i> | ForJAZ10 | 5'- CATCGGCTAAATCTCGTTCG-3'      |
| 52 |                                                | RevJAZ10 | 5'- CGGTACTAGACCTGGCGAGA-3'      |
| 53 |                                                |          |                                  |
| 54 | <i>Phytoalexin deficient 3 (PAD3)</i>          | ForPAD3  | 5'- TGTTGTAGTCGACCAGAGGC -3'     |
| 55 |                                                | RevPAD3  | 5'- CGCATCAGACTCCACTCG -3'       |
| 56 | <i>Botrytis ACTIN A (ACTA)</i>                 | ForACTA  | 5'-ACTCATATGTTGGAGATGAAGCGCA-3'  |
| 57 |                                                | RevACTA  | 5'-AATGTTACCATACAAATCCTTACGGA-3' |
| 58 |                                                |          |                                  |
